# Supplementary material for: A Single-Domain Antibody-Based Anti-PSMA Recombinant Immunotoxin Exhibits Specificity and Efficacy for Prostate Cancer Therapy
Source: MDPI journal article supplement (doi:10.3390/ijms22115501), 2021-05-23
Supplement: s1 [file s1]

## **Supporting Information**

### **A Single-Domain Antibody-Based Anti-PSMA Recombinant Immunotoxin**

#### **Exhibits Specificity and Efficacy for Prostate Cancer Therapy**

Yutong Xing, Keyuan Xu, Shixiong Li, Li Cao, Yue Nan, Qiyu Li, Wenjing Li

and Zhangyong Hong\*

State Key Laboratory of Medicinal Chemical Biology, College of Life Sciences,

Nankai University, Tianjin 300071, China; xingyutong@mail.nankai.edu.cn

(Y.X.); 1120190518@mail.nankai.edu.cn (K.X.);

2120191089@mail.nankai.edu.cn (S.L.); 1120150370@mail.nankai.edu.cn

(L.C.); 2120201117@mail.nankai.edu.cn (Y.N.); qiyuli@mail.nankai.edu.cn

(Q.L.); 1120160385@mail.nankai.edu.cn (W.L.).

\* Correspondence: hongzy@nankai.edu.cn (Z.H.); +86-022-2349-8707 (Z.H.)

**Amino acid sequence of JVM-PE24X7 and JVM-PE38** (Sequence of JVM is labeled as red and sequence of PE24X7 and PE38 is labeled as blue).

**JVM-PE24X7:**

HHHHHHHEVQLVESGGGLVQPGGSLTSCAASRFMISEYSMHWVRQAPGK  
GLEWVSTINPAGTTDYAESVKGRFTISRDNKNTLYLQMNSLKPEDTAVYY  
CDGYGYRGQGTQVTVSSGGGGSGGGGSRHRQPRGWEQLGGSPTGAEFLG  
DGGDVSFSTRGTQNWTVERLLQAHAQLEERGYVVFVGYHGTFLAAQSIVF  
GGVRAASQDLAAIWAGFYIAGDPALAYGYAQDQEPDAAGRIRNGALLRV  
YVPASSLPGFYRTSLTLAAPEAAAGEVERLIGHPLPLALDAITGPEEEGGRLET  
ILGWPLAERTVVIPSAIPTDPRNVGGDLDPSSIPDKEQAISALPDYASQPGKP  
PKDEL

**JVM-PE38:**

HHHHHHHEVQLVESGGGLVQPGGSLTSCAASRFMISEYSMHWVRQAPGK  
GLEWVSTINPAGTTDYAESVKGRFTISRDNKNTLYLQMNSLKPEDTAVYY  
CDGYGYRGQGTQVTVSSGGGGSGGGGSPEGGSLAALTAHQACHLPLETFT  
RHRQPRGWEQLEQCGYPVQRLVALYLAARLSWNQVDQVIRNALASPGSG  
GDLGEAIREQPEQARLALTAAAESERFVRQGTGNDEAGAANGPADSGD  
ALLERNYPTGAEFLGDGGDVSFSTRGTQNWTVERLLQAHRQLEERGYVVFV  
GYHGTFLAAQSIVFGGVSARSQDLDAIWRGFYIAGDPALAYGYAQDQEP  
DAGRIRNGALLRVYVPRSSLPGFYRTSLTLAAPEAAAGEVERLIGHPLPLRL  
DAITGPEEEGGRLETILGWPLAERTVVIPSAIPTDPRNVGGDLDPSSIPDKEQ  
AISALPDYASQPGKPPKDEL

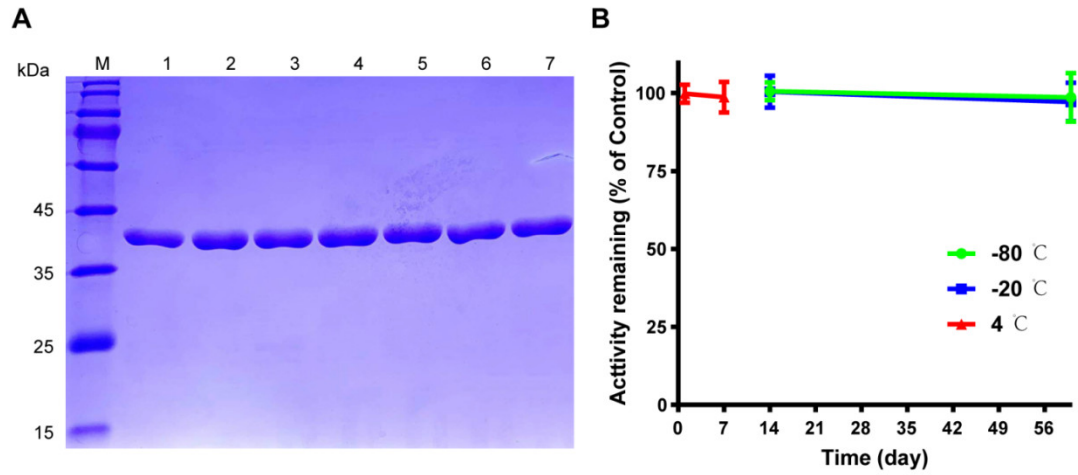

**Figure S1.** Storage stability analysis of JVM-PE24X7 by SDS-PAGE and cytotoxicity assay. **(A)** Freshly purified JVM-PE24X7 (lane 1) was stored at 4 °C for 24 h (lane 2) and 1 week (lane 3), at -20 °C for 2 weeks (lane 4) and 2 months (lane 5), and at -80 °C for 2 weeks (lane 6) and 2 months (lane 7). The proteins were loaded onto a 12.5% polyacrylamide gel with protein weight standards and detected by Coomassie brilliant blue staining **(B)** Evaluation of residual activity of JVM-PE24X7 after storage at different temperatures for different durations. Data is presented as a percentage of the remaining activity compared to the freshly purified JVM-PE24X7.

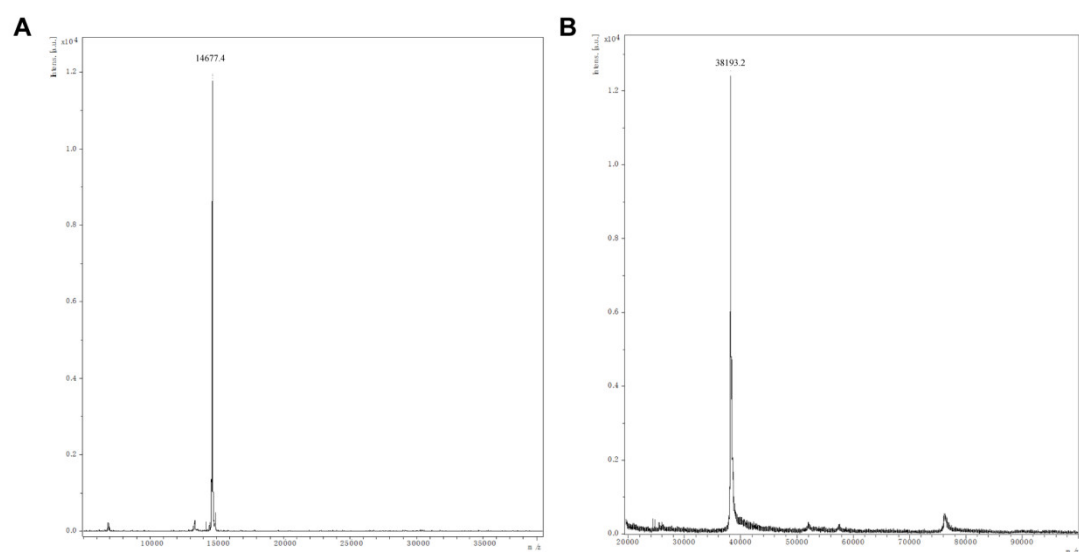

**Figure S2.** MALDI-TOF MS of purified JVM-PE24X7 and JVM. (A) Theoretical molecular mass of JVM-PE24X7 is 38172.4 Da and detected molecular mass is 38193.2 Da. (B) Theoretical molecular mass of JVM is 14621.4 Da and detected molecular mass is 14677.4 Da.

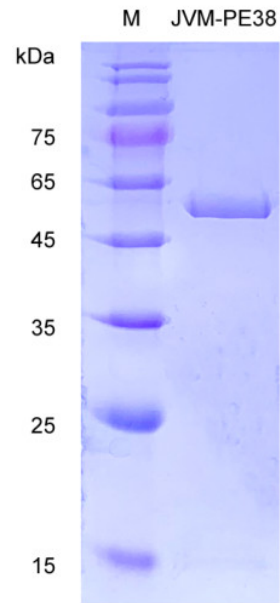

**Figure S3.** SDS-PAGE of purified JVM-PE38. The protein was loaded onto a 12.5% polyacrylamide gel with protein weight standards, and detected through Coomassie brilliant blue staining.

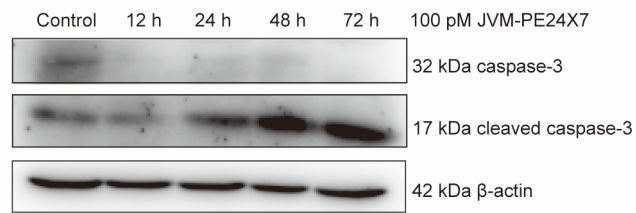

**Figure S4.** Western blot analyses of apoptosis-related proteins in C4-2B cells. Western blot showed the dynamic changes of caspase-3 and cleaved caspase-3 in C4-2B cells treated with 100 pM JVM-PE24X7 for 12 h, 24 h, 48 h or 72 h.
